# Supplementary material for: Analysis of triglyceride synthesis unveils a green algal soluble diacylglycerol acyltransferase and provides clues to potential enzymatic components of the chloroplast pathway
Source: BMC Genomics. 2017 Mar 9;18:223. doi: 10.1186/s12864-017-3602-0 (PMC5343412; doi:10.1186/s12864-017-3602-0)
Supplement: Additional file 3: — Full-length DGAT2 sequences identified in the selected algal species. (XLSX 10 kb) [file 12864_2017_3602_MOESM3_ESM.xlsx]

## Sheet: Sheet1
Additional File 3. Full-length DGAT2 sequences identified in the selected algal speciesa.
Higher ranks			Species	Number of Sequences	Sequence Idb
Archaeplastida	Glau		C. paradoxa	1	Contig25571-snap-gene-0.3
	Red Algae	Cyan	C. merolae	1	M1VCJ0
			G. sulphuraria	1	M2W897
		Fl	C. crispus	—	—
		Por	P. purpureum	1	evm.model.contig_3609.3
	Green Algae	Trebouxiophyceae	C.subellipsoidea	4	I0YX35
					I0YIN0
					I0YMB8
					I0YX64
			C. variablis	4	E1ZCH8
					E1ZSG9
					E1ZID2
					E1ZID1
		Chlorophyceae	C. reinhardtii	6	R9YW17
					A8IXB2
					A8J110
					A8INZ7
					Cre08.g377300.t1.1
			V. carteri	4	D8UGA9
					D8TL45
					D8TS74
					D8U2Q8
		Mamiellophyceae	B. prasinos	3	K8EQD6
					K8F2W3
					K8F1N5
			M. pusilla	4	C1MMU7
					C1MZ81
					C1MZ66
					C1MRZ7
			Micromonas sp.	6	C1E5W6
					C1E2R3
					C1E7X7
					C1MZ66
					C1FIB5
					C1FIB5
			O. lucimarinus	4	A4S6D6
					A4S872
					A4S5J7
					A4S1J0
			O. tauri	4	A0A096P817
					Q00UG1
					A0A090MCQ6
					A0A090M8M4
SAR	Rhizaria		B. natans	6	Bigna1|35834
					Bigna1|90599
					Bigna1|30654
					Bigna1|91906
					Bigna1|81963
					Bigna1|141997
	Alveolata		S. minutumc	17	symbB1.v1.2.000690.t1
					symbB1.v1.2.004834.t1
					symbB1.v1.2.008207.t1
					symbB1.v1.2.013406.t1
					symbB1.v1.2.016537.t1
					symbB1.v1.2.027169.t1
					symbB1.v1.2.028299.t1
					symbB1.v1.2.016873.t1
					symbB1.v1.2.032854.t1
					symbB1.v1.2.020583.t1
					symbB1.v1.2.020679.t1
					symbB1.v1.2.003954.t1
					symbB1.v1.2.010799.t1
					symbB1.v1.2.038867.t1
					symbB1.v1.2.036135.t1
					symbB1.v1.2.020426.t1
					symbB1.v1.2.021468.t1
SAR	Stramenopiles		N. gaditana	8	W7THQ4
					W7T2V9
					W7TJC9
					K8ZAL9
					Naga_100018g41.2
					W7TQ66
					K8Z2U9
					W7TTN1
			N. oceanica	11	NannoCCMP1779_358-mRNA-1
					NannoCCMP1779_3915-mRNA-1
					NannoCCMP1779_9929-mRNA-1
					NannoCCMP1779_4340-mRNA-1
					NannoCCMP1779_10272-mRNA-1
					NannoCCMP1779_5368-mRNA-1
					NannoCCMP1779_7206-mRNA-1
					NannoCCMP1779_3159-mRNA-1
					NannoCCMP1779_3705-mRNA-1
					NannoCCMP1779_10614-mRNA-1
					NannoCCMP1779_9590-mRNA-1
			A. anophagefferens	5	F0XZM2
					F0YDL5
					F0YG83
					F0YS11
					jgi|Auran1|72522
			E. siliculosus	6	D7FQF4
					D8LD78
					D7G7D5
					D8LJK0
					D8LSD5
					D8LL52
			F. cylindrusd	4	Fracy1|233574
					Fracy1|232054
					Fracy1|181385
					Fracy1|182857
			P. multiseries	4	Psemu1|299240
					Psemu1|307566
					Psemu1|283655
					Psemu1|181840
			P. tricornutum	4	I6QM80
					B7FSB9
					B7GAN7
					B7FP00
			T. pseudonana	3	B8CE46
					B8BR26
					B8BSU8
Haptophyta			E. huxleyi	7	R1DEG2
					R1DZI5
					R1DIW4
					R1G7X4
					R1DRF3
					R1FRG1
					R1DNA1
Crypto			G. theta	3	L1JHN0
					L1JZY8
					L1JKW8
a Glau, Glaucophyta; Cyan, Cyanidiophyceae; Fl, Florideophyceae; Por, Porphyridiophyceae; SAR, Stramenopiles-Alveolata-Rhizaria; Crypto, Cryptophyceae.
b Sequence IDs correspond to Uniprot IDs. If not available, locus or contig names from the corresponding genome sites are shown.
c Twenty-one non identical proteins were identified, but several of them were from the same locus and some of them appeared to be originated from incorrect gene models.
d Seven non identical proteins were identified, but several of them were from the same locus and some of them appeared to be originated from incorrect gene models.
